# Supplementary material for: Solid state synthesis of Ru–MC with highly dispersed semi-embedded ruthenium nanoparticles in a porous carbon framework for benzoic acid hydrogenation
Source: Royal Society of Chemistry journal article supplement (doi:10.1039/c6cy01049k), 2016-01-01
Supplement: c6cy01049k1.pdf [file c6cy01049k1.pdf]

## Supporting Information

### Solid state synthesis of Ru-MC with highly dispersed semi-embedded ruthenium nanoparticles in porous carbon framework for benzoic acid hydrogenation

Zhengliang Jiang, Guojun Lan, Xiaoyan Liu, Haodong Tang, Ying Li\*

Table S1 Hydrogenation of BA over Ru-MC-g catalyst at various reaction conditions

| Entry | Solvents        | Temperature<br>(°C) | Pressure<br>(MPa) | BA/Ru<br>(mol ratio) | Conv.<br>(%) | CCA Sel.<br>(%) |
|-------|-----------------|---------------------|-------------------|----------------------|--------------|-----------------|
| 1     | Water           | 120                 | 1.0               | 833                  | 5.00         | 86.5            |
| 2     | Water           | 120                 | 2.0               | 833                  | 32.2         | 89.9            |
| 3     | Water           | 120                 | 4.0               | 833                  | 93.7         | 99.1            |
| 4     | Water           | 70                  | 0.1               | 416                  | 6.15         | 97.6            |
| 5     | Water           | 70                  | 2.0               | 416                  | 37.1         | 97.0            |
| 6     | Water           | 70                  | 4.0               | 416                  | 78.4         | 99.4            |
| 7     | Water           | 70                  | 6.0               | 416                  | 92.9         | 99.8            |
| 8     | Water           | 120                 | 4.0               | 833                  | 93.7         | 99.1            |
| 9     | Ethanol         | 120                 | 4.0               | 833                  | 17.3         | 67.5            |
| 10    | Acetic acid     | 120                 | 4.0               | 833                  | 8.4          | 70.7            |
| 11    | Tetrahydrofuran | 120                 | 4.0               | 833                  | 0            | 0               |

a: entry 1-3, 8-11: BA 3.3 mmol, catalyst 20 mg, solvent water 25 mL, 120 °C, 1000

RPM. entry 4-7: BA 6.6 mmol, catalyst 20 mg.

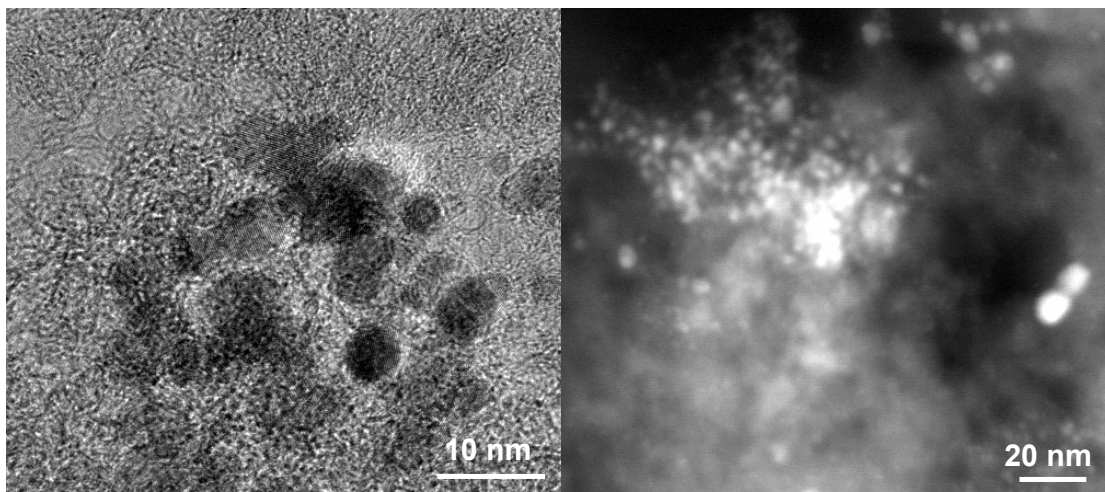

Fig. S1 HRTEM and STEM images for Ru-MC-g\* catalyst.

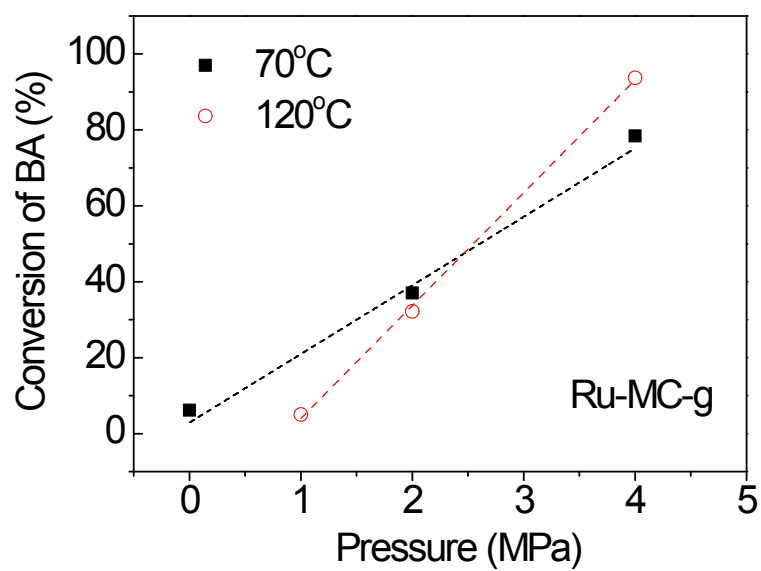

Fig. S2 The effect of H<sub>2</sub> pressure on the catalytic performance for Ru-MC-g catalyst.

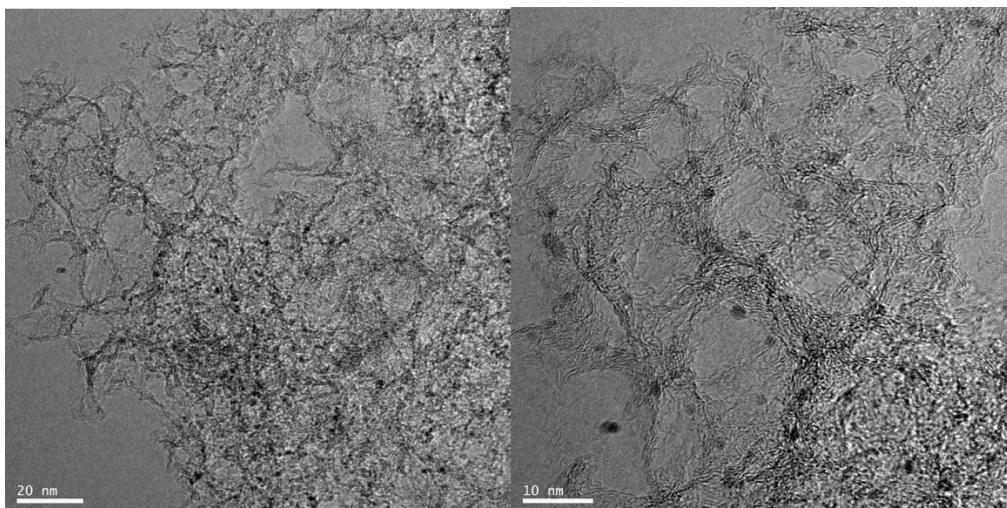

Fig. S3 HRTEM images for Ru-MC-g catalyst after 4 cycles reaction.
